# Supplementary material
Source: Springer Nature journal article supplement (https://www.springermedizin.de/resource/supplementary/12913_2014_3541_MOESM6_ESM.pdf/9533148)
Supplement: MOESM6 [file 9533148]

**Additional File 6: Reasons for not involving others in counselling**

(Only for data 2012 and if others not involved, N = 162)

|                              | Frequency | Percentage |
|------------------------------|-----------|------------|
| Regarded as a private matter | 55        | 34         |
| Fear of reactions of other   | 43        | 27         |
| No social network or alone   | 41        | 25         |
| Other reasons                | 8         | 5          |
| Unknown                      | 15        | 9          |
| Total N                      | 162       | 100        |
